# Supplementary material for: De novo assembling and primary analysis of genome and transcriptome of gray whale Eschrichtius robustus
Source: PubMed Central journal article supplement (PMC5751776; doi:10.1186/s12862-017-1103-z), 2017-12-28
Supplement: 12862_2017_1103_MOESM2_ESM.pdf [file 12862_2017_1103_MOESM2_ESM.pdf]

### Assemblies for primary comparison with BUSCO [1]

| Name                                                       | Sources                                                                                                                                                                                                                                                                                                                                      | N50, Kb                                        |
|------------------------------------------------------------|----------------------------------------------------------------------------------------------------------------------------------------------------------------------------------------------------------------------------------------------------------------------------------------------------------------------------------------------|------------------------------------------------|
| Minke whale ( <i>Balaenoptera acutorostrata scammoni</i> ) | <a href="http://www.ncbi.nlm.nih.gov/assembly/GCF_000493695.1/">http://www.ncbi.nlm.nih.gov/assembly/GCF_000493695.1/</a>                                                                                                                                                                                                                    | Scaffold N50 12,843.7 Kb<br>Contig N50 22.7 Kb |
| Bowhead whale ( <i>Balaena mysticetus</i> )                | <a href="http://alfred.liv.ac.uk/downloads/bowhead_whale/bowhead_whale_proteins.zip">http://alfred.liv.ac.uk/downloads/bowhead_whale/bowhead_whale_proteins.zip</a><br><a href="http://alfred.liv.ac.uk/downloads/bowhead_whale/bowhead_whale_scaffolds.zip">http://alfred.liv.ac.uk/downloads/bowhead_whale/bowhead_whale_scaffolds.zip</a> | Scaffolds N50 877 Kb<br>Contigs N50 34.8 Kb    |
| Antarctic minke whale ( <i>Balaenoptera bonaerensis</i> )  | <a href="http://www.ncbi.nlm.nih.gov/assembly/GCA_000978805.1">http://www.ncbi.nlm.nih.gov/assembly/GCA_000978805.1</a>                                                                                                                                                                                                                      | Scaffold N50 20 Kb<br>Contig N50 8 Kb          |

### References

1. Simão FA, Waterhouse RM, Ioannidis P, Kriventseva EV, Zdobnov EM. BUSCO: assessing genome assembly and annotation completeness with single-copy orthologs. *Bioinformatics*. 2015;31:3210-12.
