# Supplementary material for: De novo assembling and primary analysis of genome and transcriptome of gray whale Eschrichtius robustus
Source: PubMed Central journal article supplement (PMC5751776; doi:10.1186/s12862-017-1103-z), 2017-12-28
Supplement: 12862_2017_1103_MOESM3_ESM.pdf [file 12862_2017_1103_MOESM3_ESM.pdf]

### The primary analysis with the BUSCO methodology [1]

| Source                 | Complete BUSCOs (%) | Duplicated, (included in complete) (%) | Fragmented (%) | Missing, % |
|------------------------|---------------------|----------------------------------------|----------------|------------|
| Grey whale/initial     | 24                  | 0.4                                    | 24             | 50         |
| Minke whale/proteins   | 97                  | 44                                     | 1.5            | 0.6        |
| Bowhead whale/genome   | 60                  | 1.3                                    | 25             | 13         |
| Bowhead whale/proteins | 72                  | 2                                      | 14             | 12         |
| Antarctic minke whale  | NA                  | NA                                     | NA             | NA         |

### References

1. Simão FA, Waterhouse RM, Ioannidis P, Kriventseva EV, Zdobnov EM. BUSCO: assessing genome assembly and annotation completeness with single-copy orthologs. *Bioinformatics*. 2015;31:3210-12.
