# Supplementary material for: De novo assembling and primary analysis of genome and transcriptome of gray whale Eschrichtius robustus
Source: PubMed Central journal article supplement (PMC5751776; doi:10.1186/s12862-017-1103-z), 2017-12-28
Supplement: 12862_2017_1103_MOESM4_ESM.pdf [file 12862_2017_1103_MOESM4_ESM.pdf]

### Functional annotation of genes with funannotate [1]

|                                |       |
|--------------------------------|-------|
| Total genes (with description) | 10895 |
| EggNog                         | 10032 |
| InterPro                       | 9995  |
| GO                             | 7704  |
| BUSCO                          | 736   |
| PFAM                           | 1835  |
| MEROPS                         | 452   |

### References

1. Palmer JM. Funannotate: pipeline for genome annotation. <http://www.github.com/nextgenusfs/funannotate>. 2016.
