# Supplementary material for: De novo assembling and primary analysis of genome and transcriptome of gray whale Eschrichtius robustus
Source: Springer Nature journal article supplement (doi:10.1186/s12862-017-1103-z), 2017-12-01
Supplement: MOESM5 [file 12862_2017_1103_MOESM5_ESM.pdf]

### Genomic data used for phylogenetic analysis

| Used name | Species              | Source                | Link to proteins                                                                                                           | Link to CDS                                                                                                               |
|-----------|----------------------|-----------------------|----------------------------------------------------------------------------------------------------------------------------|---------------------------------------------------------------------------------------------------------------------------|
| Human     | <i>H. sapiens</i>    | ensembl<br>release-87 | ftp://ftp.ensembl.org/pub/<br>/release-<br>87/fasta/homo_sapiens/p<br>ep/Homo_sapiens.GRCh<br>38.pep.all.fa.gz             | ftp://ftp.ensembl.org/pu<br>b/release-<br>87/fasta/homo_sapiens/c<br>ds/Homo_sapiens.GRCh<br>38.cds.all.fa.gz             |
| Mouse     | <i>M. musculus</i>   | ensembl<br>release-87 | ftp://ftp.ensembl.org/pub/<br>/release-<br>87/fasta/mus_musculus/p<br>ep/Mus_musculus.GRC<br>m38.pep.all.fa.gz             | ftp://ftp.ensembl.org/pu<br>b/release-<br>87/fasta/mus_musculus/<br>cds/Mus_musculus.GR<br>Cm38.cds.all.fa.gz             |
| Rat       | <i>R. norvegicus</i> | ensembl<br>release-87 | ftp://ftp.ensembl.org/pub/<br>/release-<br>87/fasta/rattus_norvegicu<br>s/pep/Rattus_norvegicus.<br>Rnor_6.0.pep.all.fa.gz | ftp://ftp.ensembl.org/pu<br>b/release-<br>87/fasta/rattus_norvegic<br>us/cds/Rattus_norvegicu<br>s.Rnor_6.0.cds.all.fa.gz |
| Cat       | <i>F. catus</i>      | ensembl<br>release-87 | ftp://ftp.ensembl.org/pub/<br>/release-<br>87/fasta/felis_catus/pep/<br>Felis_catus.Felis_catus_6<br>.2.pep.all.fa.gz      | ftp://ftp.ensembl.org/pu<br>b/release-<br>87/fasta/felis_catus/cds/<br>Felis_catus.Felis_catus_<br>6.2.cds.all.fa.gz      |
| Cow       | <i>B. taurus</i>     | ensembl<br>release-87 | ftp://ftp.ensembl.org/pub/<br>/release-<br>87/fasta/bos_taurus/pep/<br>Bos_taurus.UMD3.1.pep<br>.all.fa.gz                 | ftp://ftp.ensembl.org/pu<br>b/release-<br>87/fasta/bos_taurus/cds/<br>Bos_taurus.UMD3.1.cds<br>.all.fa.gz                 |
| Dog       | <i>C. familiaris</i> | ensembl<br>release-87 | ftp://ftp.ensembl.org/pub/<br>/release-<br>87/fasta/canis_familiaris/<br>pep/Canis_familiaris.Can<br>Fam3.1.pep.all.fa.gz  | ftp://ftp.ensembl.org/pu<br>b/release-<br>87/fasta/canis_familiaris<br>/cds/Canis_familiaris.Ca<br>nFam3.1.cds.all.fa.gz  |
| Macaque   | <i>M. mulatta</i>    | ensembl<br>release-87 | ftp://ftp.ensembl.org/pub/<br>/release-<br>87/fasta/macaca_mulatta/<br>pep/Macaca_mulatta.Mm<br>mul_8.0.1.pep.all.fa.gz    | ftp://ftp.ensembl.org/pu<br>b/release-<br>87/fasta/macaca_mulatta<br>/cds/Macaca_mulatta.M<br>mul_8.0.1.cds.all.fa.gz     |
| Dolphin   | <i>T. truncatus</i>  | ensembl<br>release-87 | ftp://ftp.ensembl.org/pub/<br>/release-<br>87/fasta/tursiops_truncat                                                       | ftp://ftp.ensembl.org/pu<br>b/release-<br>87/fasta/tursiops_truncat                                                       |

|                          |                             |                       |                                                                                                                                                                                             |                                                                                                                                                                                                              |
|--------------------------|-----------------------------|-----------------------|---------------------------------------------------------------------------------------------------------------------------------------------------------------------------------------------|--------------------------------------------------------------------------------------------------------------------------------------------------------------------------------------------------------------|
|                          |                             |                       | us/pep/Tursiops_truncatu<br>s.turTru1.pep.all.faa.gz                                                                                                                                        | us/cds/Tursiops_truncat<br>us.turTru1.cds.all.faa.gz                                                                                                                                                         |
| Pig                      | <i>S. scrofa</i>            | ensembl<br>release-87 | ftp://ftp.ensembl.org/pub<br>/release-<br>87/fasta/sus_scrofa/pep/S<br>us_scrofa.Sscrofa10.2.pe<br>p.all.faa.gz                                                                             | ftp://ftp.ensembl.org/pu<br>b/release-<br>87/fasta/sus_scrofa/cds/<br>Sus_scrofa.Sscrofa10.2.<br>cds.all.faa.gz                                                                                              |
| Minke whale              | <i>B.<br/>acutorostrata</i> | NCBI                  | ftp://ftp.ncbi.nlm.nih.gov<br>/genomes/all/GCF/000/4<br>93/695/GCF_000493695.<br>1_BalAcu1.0/GCF_0004<br>93695.1_BalAcu1.0_prot<br>ein.faa.gz                                               | ftp://ftp.ncbi.nlm.nih.go<br>v/genomes/all/GCF/000/<br>493/695/GCF_0004936<br>95.1_BalAcu1.0/GCF_0<br>00493695.1_BalAcu1.0<br>_cds_from_genomic.fna<br>.gz                                                   |
| Yangzte river<br>dolphin | <i>L. vexillifer</i>        | NCBI                  | ftp://ftp.ncbi.nlm.nih.gov<br>/genomes/all/GCF/000/4<br>42/215/GCF_000442215.<br>1_Lipotes_vexillifer_v1/<br>GCF_000442215.1_Lipo<br>tes_vexillifer_v1_protein<br>.faa.gz                   | ftp://ftp.ncbi.nlm.nih.go<br>v/genomes/all/GCF/000/<br>442/215/GCF_0004422<br>15.1_Lipotes_vexillifer_<br>v1/GCF_000442215.1_<br>Lipotes_vexillifer_v1_c<br>ds_from_genomic.fna.g<br>z                       |
| Killer whale             | <i>O. orca</i>              | NCBI                  | ftp://ftp.ncbi.nlm.nih.gov<br>/genomes/all/GCF/000/3<br>31/955/GCF_000331955.<br>2_Oorc_1.1/GCF_00033<br>1955.2_Oorc_1.1_protei<br>n.faa.gz                                                 | ftp://ftp.ncbi.nlm.nih.go<br>v/genomes/all/GCF/000/<br>331/955/GCF_0003319<br>55.2_Oorc_1.1/GCF_00<br>0331955.2_Oorc_1.1_cd<br>s_from_genomic.fna.gz                                                         |
| Sperm whale              | <i>P.<br/>macrocephalus</i> | NCBI                  | ftp://ftp.ncbi.nlm.nih.gov<br>/genomes/all/GCF/000/4<br>72/045/GCF_000472045.<br>1_Physeter_macrocephal<br>us-<br>2.0.2/GCF_000472045.1<br>_Physeter_macrocephalu<br>s-2.0.2_protein.faa.gz | ftp://ftp.ncbi.nlm.nih.go<br>v/genomes/all/GCF/000/<br>472/045/GCF_0004720<br>45.1_Physeter_macroce<br>phalus-<br>2.0.2/GCF_000472045.<br>1_Physeter_macroceph<br>alus-<br>2.0.2_cds_from_genomi<br>c.fna.gz |
| Platypus                 | <i>O. anatinus</i>          | ensembl<br>release-87 | ftp://ftp.ensembl.org/pub<br>/release-                                                                                                                                                      | ftp://ftp.ensembl.org/pu<br>b/release-                                                                                                                                                                       |

|               |                      |                                                                           |                                                                                                                                                                     |                                                                                                                                                                                     |
|---------------|----------------------|---------------------------------------------------------------------------|---------------------------------------------------------------------------------------------------------------------------------------------------------------------|-------------------------------------------------------------------------------------------------------------------------------------------------------------------------------------|
|               |                      |                                                                           | 87/fasta/ornithorhynchus_anatinus/pep/Ornithorhynchus_anatinus.OANA5.pep.all.fa.gz                                                                                  | 87/fasta/ornithorhynchus_anatinus/cds/Ornithorhynchus_anatinus.OANA5.cds.all.fa.gz                                                                                                  |
| Bowhead whale | <i>B. mysticetus</i> | <a href="http://www.bowhead-whale.org/">http://www.bowhead-whale.org/</a> | <a href="http://alfred.liv.ac.uk/downloads/bowhead_whale/bowhead_whale_proteins.zip">http://alfred.liv.ac.uk/downloads/bowhead_whale/bowhead_whale_proteins.zip</a> | <a href="http://alfred.liv.ac.uk/downloads/bowhead_whale/bowhead_whale_coding_sequences.zip">http://alfred.liv.ac.uk/downloads/bowhead_whale/bowhead_whale_coding_sequences.zip</a> |
