# Supplementary material for: De novo assembling and primary analysis of genome and transcriptome of gray whale Eschrichtius robustus
Source: Springer Nature journal article supplement (doi:10.1186/s12862-017-1103-z), 2017-12-01
Supplement: MOESM6 [file 12862_2017_1103_MOESM6_ESM.pdf]

**A priori estimates of the dates of divergence obtained by using TimeTree resource [1]**

| Species               |             | Time of divergence (million years ago) |           |
|-----------------------|-------------|----------------------------------------|-----------|
|                       |             | Estimated time                         | CI        |
| Platypus              | All         | 177                                    | 164-191   |
| Dog                   | Cat         | 54.6                                   | 52-57.3   |
| Minke whale           | Sperm whale | 33.5                                   | 30.6–36.7 |
| Human                 | Macaque     | 27.7                                   | 23.4–32.7 |
| Rat                   | Mouse       | 24.6                                   | 16.6-36.4 |
| Yangtze river dolphin | Sperm whale | 34                                     | 31-37.3   |

**References**

1. Kumar S, Stecher G, Suleski M, Hedges SB. TimeTree: A Resource for Timelines, Timetrees, and Divergence Times. *Molecular biology and evolution*. 2017;34:1812-19.
