# Supplementary material for: De novo assembling and primary analysis of genome and transcriptome of gray whale Eschrichtius robustus
Source: Springer Nature journal article supplement (doi:10.1186/s12862-017-1103-z), 2017-12-01
Supplement: MOESM10 [file 12862_2017_1103_MOESM10_ESM.pdf]

## Transcriptome read mapping statistics

| Specimen ID         | Total read count after trimming | Mapped reads (unpaired mode) | Mapped reads (paired mode) | Correctly paired reads |
|---------------------|---------------------------------|------------------------------|----------------------------|------------------------|
| bowhead_kidney1     | 70748234                        | 55691708                     | 55622994                   | 38670946               |
| bowhead_kidney2     | 76299640                        | 58439682                     | 60202648                   | 42073914               |
| bowhead_kidney3     | 58651082                        | 45739322                     | 46278862                   | 33147354               |
| bowhead_kidney4     | 63716658                        | 46115982                     | 50420498                   | 32504022               |
| bowhead_liver1      | 56513824                        | 46548106                     | 46437126                   | 36214272               |
| bowhead_liver2      | 68031334                        | 56287658                     | 55878662                   | 43822036               |
| bowhead_liver3      | 67000946                        | 54045924                     | 54161676                   | 41020994               |
| gray_kidney_mother1 | 32928788                        | 30523534                     | 27017448                   | 23495184               |
| gray_liver1         | 52344570                        | 48209046                     | 43384260                   | 36975004               |
| minke_kidney1       | 69680452                        | 51735856                     | 56264316                   | 38087696               |
| minke_liver1        | 57539188                        | 48399998                     | 46758994                   | 37358692               |

See Additional file 7 for the data sources overview.
