# Supplementary material for: De novo assembling and primary analysis of genome and transcriptome of gray whale Eschrichtius robustus
Source: BMC Evol Biol. 2017 Dec 28;17(Suppl 2):258. doi: 10.1186/s12862-017-1103-z (PMC5751776; doi:10.1186/s12862-017-1103-z)
Supplement: Supplementary file 7 — Comparative assessment of the resulting gray whale transcriptome assembly. (PDF 127 kb) [file 12862_2017_1103_MOESM7_ESM.pdf]

## Comparative assessment of the resulting gray whale transcriptome assembly

### Data sources

For general comparison we used bowhead whale transcriptome assemblies published by Keane et al., which correspond to Alaska and Greenland specimens, and the respective genome assembly [1].

For analysis of differential gene expression we used raw data on liver and kidney transcriptomes from bowhead whale [2] and minke whale [3], see also the Table 10 in the Supplementary materials of the last paper.

### Comparative assessment based on published transcriptome assemblies

**Table S1** General assessment of the transcriptome assemblies

|                         | Gray whale transcriptome | Bowhead whale transcriptome (Alaska) | Bowhead whale transcriptome (Greenland) | Bowhead whale genome (CDS) |
|-------------------------|--------------------------|--------------------------------------|-----------------------------------------|----------------------------|
| Total number of contigs | 114233                   | 423657                               | 1059024                                 | 22677                      |
| N50                     | 1280                     | 2436                                 | 1283                                    | 1671                       |

It is worth noting, that both bowhead whale transcriptomes have unrealistic total number of contigs, with an extreme value over a million for the Greenland specimen transcriptome. The N50 value is too high for the Alaska specimen. All in all, both bowhead whale transcriptomes seem to contain an increased number of ‘false positive’ contigs.

**Table S2** Comparison of the transcriptome assemblies versus the genome assembly CDSs

|                                                                                               | Gray whale transcriptome | Bowhead whale transcriptome (Alaska) | Bowhead whale transcriptome (Greenland) |
|-----------------------------------------------------------------------------------------------|--------------------------|--------------------------------------|-----------------------------------------|
| Number of mapped contigs (transcriptome to genome)                                            | 35242                    | 84465                                | 131617                                  |
| Number of CDSs covered by transcriptome contig hits                                           | 17880                    | 20457                                | 19557                                   |
| Number of reliably mapped contigs (>0.7 length and > 0.7 identity for a transcriptome contig) | 11220                    | 11122                                | 16821                                   |

|                                                                                         |       |       |       |
|-----------------------------------------------------------------------------------------|-------|-------|-------|
| Number of genomic CDS covered by reliable hits (>0.7 length and > 0.7 identity for CDS) | 6178  | 5819  | 7160  |
| Fraction of mapped transcriptome contigs                                                | 0.308 | 0.199 | 0.124 |
| Fraction of reliably mapped transcriptome contigs                                       | 0.098 | 0.026 | 0.016 |

**Table S3** Comparison of the transcription assemblies versus the bowhead whale (Alaska) transcriptome assembly

|                                                                                                    | Gray whale | Bowhead whale transcriptome (Greenland) |
|----------------------------------------------------------------------------------------------------|------------|-----------------------------------------|
| Number of mapped contigs                                                                           | 94863      | 382966                                  |
| Number of target transcriptome contigs with hits                                                   | 121025     | 294747                                  |
| Number of reliably mapped contigs (>0.7 length and > 0.7 identity for a query contig)              | 75055      | 195383                                  |
| Number of target contigs with reliable hits (>0.7 length and > 0.7 identity for the target contig) | 79288      | 155220                                  |
| Fraction of mapped transcriptome contigs                                                           | 0.830      | 0.362                                   |
| Fraction of reliably mapped contigs                                                                | 0.657      | 0.184                                   |

## References

1. Keane M, Semeiks J, Webb AE, Li YI, Quesada V, Craig T, Madsen LB, van Dam S, Brawand D, Marques PI, Michalak P, Kang L, Bhak J, Yim HS, Grishin NV, Nielsen NH, Heide-Jorgensen MP, Oziolor EM, Matson CW, Church GM, Stuart GW, Patton JC, George JC, Suydam R, Larsen K, Lopez-Otin C, O'Connell MJ, Bickham JW, Thomsen B, de Magalhaes JP. Insights into the evolution of longevity from the bowhead whale genome. *Cell Rep.* 2015;10:112-22.
2. Seim I, Ma S, Zhou X, Gerashchenko MV, Lee SG, Suydam R, George JC, Bickham JW, Gladyshev VN. The transcriptome of the bowhead whale *Balaena mysticetus* reveals adaptations of the longest-lived mammal. *Aging (Albany NY).* 2014;6:879-99.
3. Yim HS, Cho YS, Guang X, Kang SG, Jeong JY, Cha SS, Oh HM, Lee JH, Yang EC, Kwon KK, Kim YJ, Kim TW, Kim W, Jeon JH, Kim SJ, Choi DH, Jho S, Kim HM, Ko J, Kim H, Shin YA, Jung HJ, Zheng Y, Wang Z, Chen Y, Chen M, Jiang A, Li E, Zhang S, Hou H, Kim TH, Yu L, Liu S, Ahn K, Cooper J, Park SG, Hong CP, Jin W, Kim HS,

Park C, Lee K, Chun S, Morin PA, O'Brien SJ, Lee H, Kimura J, Moon DY, Manica A, Edwards J, Kim BC, Kim S, Wang J, Bhak J, Lee HS, Lee JH. Minke whale genome and aquatic adaptation in cetaceans. *Nat Genet.* 2014;46:88-92.
